# Supplementary material for: The majority of autosomal recessive nanophthalmos and posterior microphthalmia can be attributed to biallelic sequence and structural variants in MFRP and PRSS56
Source: PubMed Central journal article supplement (PMC6987234; doi:10.1038/s41598-019-57338-2), 2020-01-28

## SUPPLEMENTAL FIGURES

The majority of autosomal recessive nanophthalmos and posterior microphthalmia can be attributed to biallelic sequence and structural variants in *MFRP* and *PRSS56*

Basamat Almoallem, MD, PhD<sup>1,2</sup>; Gavin Arno, PhD<sup>3,4</sup>; Julie De Zaeytijd, MD<sup>5</sup>; Hannah Verdin, PhD<sup>1</sup>, Irina Balikova, MD, PhD<sup>5</sup>; Ingele Casteels, MD, PhD<sup>6</sup>, Thomy de Ravel, PhD<sup>7</sup>; Sarah Hull, MD<sup>3,4</sup>; Martina Suzani, MD<sup>3,4</sup>; Anne Destrée, MD<sup>8</sup>; Michelle Peng, MD<sup>9</sup>; Denise Williams, FRCP<sup>10</sup>; John R. Ainsworth, MD<sup>10</sup>; Andrew R. Webster, MD, PhD<sup>3,4</sup>; Bart P. Leroy, MD, PhD<sup>1,5,11</sup>; Anthony T. Moore, MD, PhD<sup>3,4,9</sup>; Elfride De Baere, MD, PhD<sup>1</sup>.

1. Center for Medical Genetics, Ghent University and Ghent University Hospital, Ghent, Belgium; 2. Department of Ophthalmology, King Abdul-Aziz University Hospital, College of Medicine, King Saud University, Riyadh, Saudi Arabia; 3. Institute of Ophthalmology, University College London, United Kingdom; 4. Department of Ophthalmology, Moorfields Eye Hospital, London, United Kingdom; 5. Department of Ophthalmology, Ghent University and Ghent University Hospital, Belgium; 6. Department of Ophthalmology, Leuven University Hospitals, Belgium; 7. Center for Human Genetics, University Hospitals of Leuven, Leuven, Belgium; 8. Department of Human Genetics, Institut de Pathologie et de Génétique (IPG), Charleroi, Belgium; 9. Department of Ophthalmology, University of California San Francisco, United States; 10. Birmingham Women's NHS Foundation Trust, Birmingham, UK; 11. Division of Ophthalmology, The Children's Hospital of Philadelphia, Philadelphia, Pennsylvania, United States.

**Supplementary Figure 1. Outcome of homozygosity mapping and targeted mutation screening in three consanguineous families**

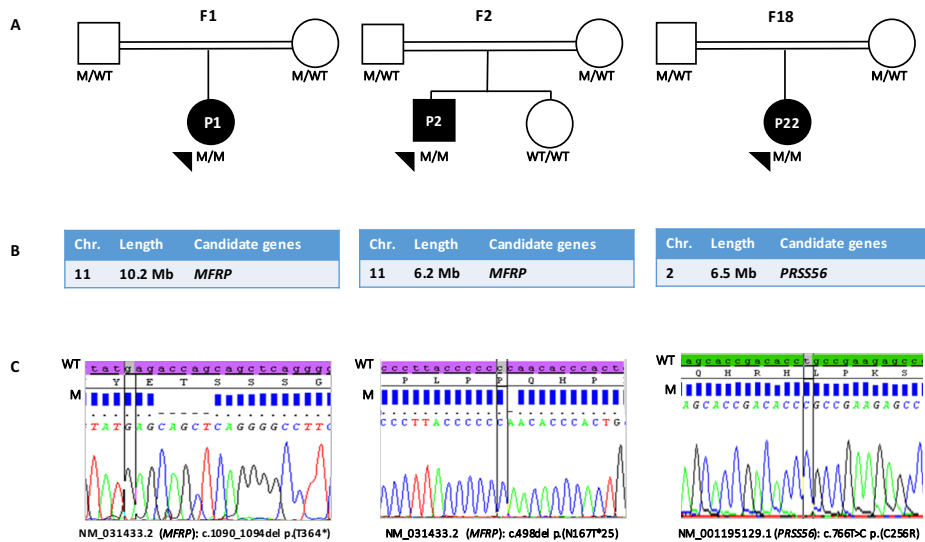

(A) Pedigrees of three consanguineous families (F1, F2 and F18). Filled symbols indicate affected individuals. Index cases are indicated by an arrow; a double line between a couple indicates consanguinity. Different genotypes are represented: homozygous mutant (M/M), heterozygous mutant (M/WT) and homozygous wild type (WT/WT). (B) Homozygosity mapping representing the size of the homozygous regions in which *MFRP* and *PRSS56* are located. (C) Sanger sequence electropherograms showing homozygous *MFRP*/*PRSS56* mutations.

**Supplementary Figure 2. Molecular workflow in 21 unrelated families with NNO or MCOP.**

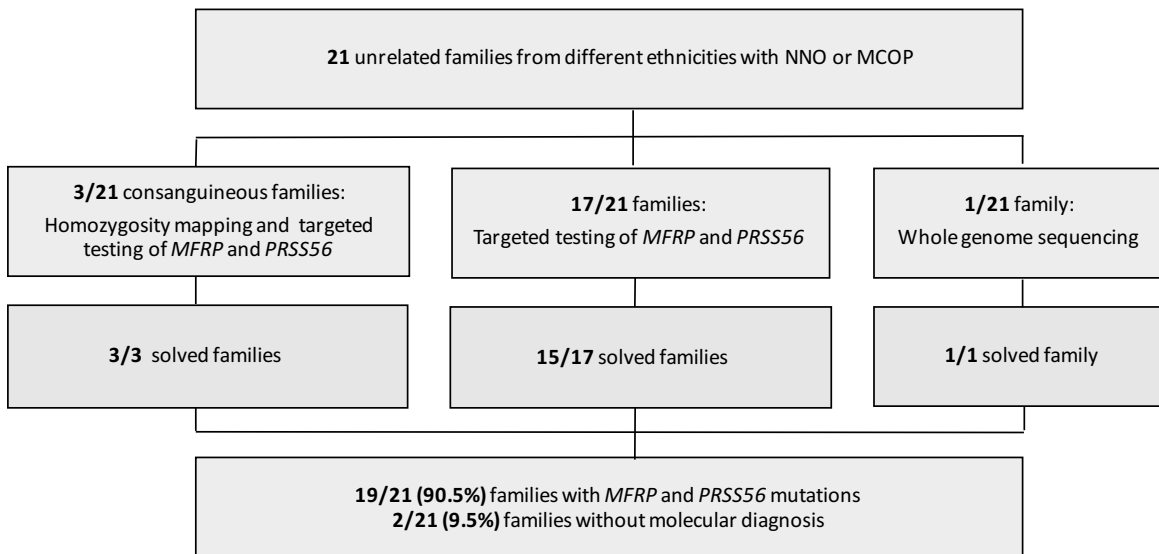

Supplement: 41598_2019_57338_MOESM1_ESM.pdf [file 41598_2019_57338_MOESM1_ESM.pdf]
